# Supplementary material for: Low 25-Hydroxyvitamin D Concentration Is Not Associated With Refractive Error in Middle-Aged and Older Western Australian Adults
Source: PubMed Central journal article supplement — Transl Vis Sci Technol. 2019 Jan 22;8(1):13. doi: 10.1167/tvst.8.1.13 (PMC6348994; doi:10.1167/tvst.8.1.13), 2019-01-22
Supplement: tvst-08-01-03_s01.pdf [file tvst-08-01-03_s01.pdf]

**Supplementary Table 1:** Univariate associations between potential confounders and spherical equivalent and deseasonalised 25[OH]D using linear regression

|                                                  | Spherical Equivalent |                  | Deseasonalised 25[OH]D |                  |
|--------------------------------------------------|----------------------|------------------|------------------------|------------------|
|                                                  | Beta (95% CI)        | p value          | Beta (95% CI)          | p value          |
| Age                                              | 0.02 (0.01, 0.03)    | <b>&lt;0.001</b> | 0.29 (0.16, 0.42)      | <b>&lt;0.001</b> |
| Sex                                              |                      |                  |                        |                  |
| Male                                             | Reference            |                  | Reference              |                  |
| Female                                           | 0.04 (-0.05, 0.14)   | 0.38             | -6.94 (-8.44, -5.45)   | <b>&lt;0.001</b> |
| Highest Education*                               |                      | <b>&lt;0.001</b> |                        | 0.82             |
| Secondary School or lower                        | Reference            |                  | Reference              |                  |
| Other (e.g. TAFE <sup>†</sup> )                  | -0.14 (-0.25, -0.03) | <b>0.01</b>      | -0.23 (-1.96, 1.50)    | 0.80             |
| University                                       | -0.48 (-0.61, -0.35) | <b>&lt;0.001</b> | -0.66 (-2.67, 1.36)    | 0.52             |
| Longest Occupation*                              |                      | <b>0.004</b>     |                        | <b>&lt;0.001</b> |
| Mostly Indoor                                    | Reference            |                  | Ref                    |                  |
| Mixed Indoor/Outdoor                             | 0.14 (-0.06, 0.33)   | 0.18             | 3.15 (0.13, 6.17)      | <b>0.04</b>      |
| Mostly Outdoor                                   | 0.19 (0.07, 0.30)    | <b>0.001</b>     | 5.95 (4.21, 7.69)      | <b>&lt;0.001</b> |
| BMI                                              | -0.001 (-0.01, 0.01) | 0.90             | -1.21 (-1.36, -1.06)   | <b>&lt;0.001</b> |
| Physical activity (per 100 mins a week increase) | 0.003 (-0.003, 0.01) | 0.32             | 0.43 (0.34, 0.53)      | <b>&lt;0.001</b> |
| Hours sitting per day                            | -0.04 (-0.06, -0.02) | <b>&lt;0.001</b> | -0.52 (-0.81, -0.22)   | <b>&lt;0.001</b> |
| Taking vitamin D supplement                      |                      |                  |                        |                  |
| No                                               | Reference            |                  | Reference              |                  |
| Yes                                              | -0.09 (-0.24, 0.06)  | 0.24             | 4.90 (2.55, 7.26)      | <b>&lt;0.001</b> |
| Retired                                          |                      |                  |                        |                  |
| No                                               | Reference            |                  | Reference              |                  |
| Yes                                              | -0.10 (-0.28, 0.08)  | 0.29             | 5.21 (2.39, 8.04)      | <b>&lt;0.001</b> |

p values <0.10 in bold

\*p values from Type III F-test

†Vocational or technical tertiary education in Australia

**Supplementary Table 2** Sensitivity analysis of the association between spherical equivalent and myopia and 25[OH]D groups according to different cut-offs after adjustment for age, education, sitting hours, retirement and occupational sun exposure

| 25[OH]D group    | Median (nmol/L) | Spherical Equivalent* |         | Myopia†            |         |
|------------------|-----------------|-----------------------|---------|--------------------|---------|
|                  |                 | Beta (95% CI)         | p value | OR (95% CI)        | p value |
| <40nmol/L        | 36.5            | -0.06 (-0.47 - 0.34)  | 0.75    | 1.03 (0.61 - 1.74) | 0.91    |
| ≥40 to <60nmol/L | 53.2            | 0.10 (-0.07 - 0.27)   | 0.24    | 0.78 (0.62 - 0.98) | 0.03    |
| ≥60 to <80nmol/L | 70.3            | 0.15 (0.01 - 0.29)    | 0.04    | 0.78 (0.65 - 0.95) | 0.01    |
| 80 to <100nmol/L | 88.3            | 0.01 (-0.13 - 0.16)   | 0.85    | 0.86 (0.71 - 1.05) | 0.13    |
| ≥100nmol/L       | 112.8           | 1 (Reference)         |         | 1 (Reference)      |         |

\*Multivariate linear regression

†Multivariate logistic regression
